# Supplementary material for: Adding non-randomised studies to a Cochrane review brings complementary information for healthcare stakeholders: an augmented systematic review and meta-analysis
Source: Springer Nature journal article supplement (doi:10.1186/s12913-016-1816-5), 2016-10-21
Supplement: MOESM2 [file 10937904]

**Adding NRS to a Cochrane review on CDM and asthma: an augmented systematic review and meta-analysis / Supplementary Table: Key components of included studies**

| Study ID       | Design (allocation) | Country HC setting                                      | Patients                                                   | Intervention (name <sup>1</sup> , duration, number of components, main component)                                                                                                                           | Comparison                                               | Outcomes                                                                                       |
|----------------|---------------------|---------------------------------------------------------|------------------------------------------------------------|-------------------------------------------------------------------------------------------------------------------------------------------------------------------------------------------------------------|----------------------------------------------------------|------------------------------------------------------------------------------------------------|
| Armour 2007    | C-RCT (pharmacy)    | Australia<br>Rural and urban pharmacies                 | N=346<br>women: 63.7%<br>mean age: 49.1<br>asthma: mod/sev | Pharmacy Asthma Care Program<br>6 months<br>components: 8<br>main: EDU                                                                                                                                      | Usual care (including minimal training for pharmacists)  | Org: 1<br>Process: 6<br>QOL: 1<br>Symptoms/activity: 2<br>Self-care: 5<br>Lung function: 2     |
| Cambach 1997   | RCT                 | Netherlands<br>Local physiotherapy practices            | N=43<br>women: 74.4%<br>mean age: 46.3<br>asthma: mild/mod | Rehabilitation program<br>3 months<br>components: 6<br>main: ORG_PT                                                                                                                                         | Usual care                                               | QOL: 1<br>Symptoms/activity: 3                                                                 |
| Castro 2003    | RCT                 | USA<br>Inpatients and outpatients in a hospital         | N=96<br>women: 82.4%<br>mean age: 36.4<br>asthma: mod/sev  | Asthma nurse specialist for "high-risk" inpatients<br>6 months<br>components: 10<br>main: ORG_PT / ORG_HC                                                                                                   | Usual care (including minimal intervention for patients) | HC use: 8<br>QOL: 1                                                                            |
| Charrois 2006  | RCT                 | Canada<br>Community rural pharmacies and PCPs           | N=70<br>women: 53%<br>mean age: 37.2<br>asthma: mod/sev    | Better Respiratory Education and Asthma Treatment in Hinton and Edson (BREATHE)<br>6 months<br>components: 11<br>main: EDU / ORG_HC                                                                         | Usual care (including minimal intervention for patients) | Org: 1<br>Process: 3<br>HC use: 1<br>Symptoms/activity: 2<br>Lung function: 1                  |
| Couturaud 2002 | RCT                 | France<br>Outpatient clinic of two university hospitals | N=54<br>women: 68%<br>mean age: 38<br>asthma: mod/sev      | Educational program following treatment readjustment<br>12 months<br>components: 7<br>main: EDU                                                                                                             | Usual care                                               | HC use: 1<br>QOL: 1<br>Symptoms/activity: 3<br>Self-care: 3<br>Lung function: 1                |
| Galbreath 2008 | RCT                 | USA<br>University medical centre and a PCP              | N=386<br>women: 79%<br>mean age: 42.8<br>asthma: mod/sev   | The South Texas Asthma Management Project (STAMP)<br>6 months<br>components: 9<br>main: EDU / ORG_PT                                                                                                        | Usual care                                               | Org: 1<br>Process: 2<br>HC use: 4<br>QOL: 1<br>Symptoms/activity: 2<br>Lung function: 3        |
| Huang 2009     | RCT                 | Taiwan<br>Outpatient chest department of a hospital     | N=148<br>women: 27.3%<br>mean age: na<br>asthma: mod/sev   | Individualised self-care education program<br>6 months<br>components: 6<br>main: EDU                                                                                                                        | Usual care (including minimal intervention for patients) | Process: 1<br>HC use: 1<br>Symptoms/activity: 2<br>Self-care: 3<br>Lung function: 4            |
| Kokubu 2000    | RCT                 | Japan<br>Hospital and patients' home                    | N=66<br>women: 58.9%<br>mean age: 48.6<br>asthma: na       | Asthma telemedicine system<br>6 months<br>components: 8<br>main: ORG_HC                                                                                                                                     | Usual care                                               | HC use: 4<br>Pt satis: 1<br>QOL: 1<br>Symptoms/activity: 3<br>Self-care: 3<br>Lung function: 1 |
| Martin 2009    | RCT                 | USA<br>PCPs                                             | N=37<br>women: 68.3%<br>mean age: 35<br>asthma: na         | Community-based intervention to improve asthma self-efficacy in African American adults designed by the Chicago Initiative to Raise Asthma Health Equity (CHIRAH)<br>3 months<br>components: 7<br>main: EDU | Usual care (including minimal intervention for patients) | Org: 1<br>Process: 2<br>QOL: 1<br>Symptoms/activity: 3<br>Self-care: 3                         |
| Mayo 1990      | RCT                 | USA<br>Outpatient chest clinic of a hospital            | N=104<br>women: 63.5%<br>mean age: 42<br>asthma: mod/sev   | Outpatient program to reduce readmissions for asthma exacerbations<br>8 months<br>components: 6<br>main: EDU                                                                                                | Usual care                                               | HC use: 1<br>Symptoms/activity: 1                                                              |

| Study ID         | Design (allocation) | Country HC setting                                            | Patients                                                    | Intervention (name <sup>1</sup> , duration, number of components, main component)                                                                                               | Comparison                                               | Outcomes                                                                                                  |
|------------------|---------------------|---------------------------------------------------------------|-------------------------------------------------------------|---------------------------------------------------------------------------------------------------------------------------------------------------------------------------------|----------------------------------------------------------|-----------------------------------------------------------------------------------------------------------|
| McLean 2003      | RCT                 | Canada<br>Community pharmacies                                | N=224<br>women: 63%<br>mean age: na<br>asthma: na           | The British Columbia pharmacy asthma study incorporating an asthma care protocol provided by specially trained community pharmacists<br>12 months<br>components: 7<br>main: EDU | Usual care                                               | HC use: 4<br>Pt satis: 1<br>QOL: 1<br>Symptoms/activity: 4<br>Self-care: 1<br>Lung function: 1            |
| Petro 2005       | C-RCT (provider)    | Germany<br>PCPs                                               | N=111<br>women: 49.1%<br>mean age: 56.2<br>asthma: mod/sev  | A disease management program with a case manager<br>12 months<br>components: 7<br>main: ORG HC                                                                                  | Usual care                                               | HC use: 2<br>QOL: 3<br>Symptoms/activity: 1<br>Lung function: 2                                           |
| Schatz 2006      | RCT                 | USA<br>Kaiser Permanente Medical Care program                 | N=45<br>women: 39.8%<br>mean age: 45.1<br>asthma: mod/sev   | Regular care manager and intensive individualised educational visit<br>12 months<br>components: 11<br>main: EDU / ORG_PT                                                        | Usual care (including minimal intervention for patients) | Process: 1<br>HC use: 1<br>QOL: 1<br>Symptoms/activity: 2<br>Self-care: 1                                 |
| Smith 2005       | RCT                 | UK<br>Outpatient asthma clinics of a hospital and PCPs        | N=84<br>women: 73%<br>mean age: 36.4<br>asthma: mod/sev     | The Coping with Asthma Study (a home based, nurse led psycho-educational intervention for adults at risk of adverse asthma outcomes)<br>6 months<br>components: 15<br>main: EDU | Usual care                                               | QOL: 6<br>Symptoms/activity: 1<br>Self-care: 6                                                            |
| Wilson 2010      | RCT                 | USA<br>Kaiser Permanente clinics                              | N=551<br>women: 56.5%<br>mean age: 46.3<br>asthma: mod/sev  | The Better Outcomes of Asthma Treatment (BOAT) study<br>9 months<br>components: 9<br>main: EDU / ORG_PT                                                                         | Usual care (including minimal intervention for patients) | Process: 1<br>HC use: 2<br>QOL: 1<br>Symptoms/activity: 5<br>Lung function: 2                             |
| Herborg 2001     | C-QRCT (pharmacy)   | Denmark<br>Community pharmacies                               | N=413<br>women: 56.2%<br>mean age: 40.6<br>asthma: mod/sev  | Therapeutic outcomes monitoring (TOM) program<br>12 months<br>components: 9<br>main: ORG_PT                                                                                     | Usual care                                               | Org : 3<br>HC use: 7<br>Pt satis: 1<br>QOL: 2<br>Symptoms/activity: 4<br>Self-care: 1<br>Lung function: 1 |
| Feifer 2004      | CBA*                | USA<br>PCPs in a region covered by a health insurance company | N=70,900<br>women: 56%<br>mean age: na<br>asthma:na         | Population-based asthma disease management program using broad-based educational interventions<br>12 months<br>components: 7<br>main: EDU / ORG_PT                              | Usual care                                               | Process: 3<br>HC use: 3<br>QOL: 1<br>Symptoms/activity: 4<br>Self-care: 3                                 |
| Landon 2000      | CBA*                | USA<br>Community health centers                               | N=3392<br>women: 65.6%<br>mean age: 31.4<br>asthma: na      | Health Disparities Collaboratives disseminating quality-improvement techniques<br>54 months<br>components: ≥11<br>main: ORG HC                                                  | Usual care                                               | Process: 7<br>HC use: 1<br>Symptoms/activity: 1                                                           |
| Weng 2005        | CBA*                | Taiwan<br>Outpatient clinics of a hospital and PCPs           | N=4042<br>women: 43.3%<br>mean age: na<br>asthma: na        | A government-sponsored outpatient-based disease management program<br>12 months<br>components: 8<br>main: EDU                                                                   | Usual care                                               | Pro satis: 1<br>HC use: 4                                                                                 |
| Windt 2010       | CBA*                | Germany<br>PCPs                                               | N=634<br>women: 46.4%<br>mean age: 36.5<br>asthma: na       | Nationwide asthma disease management program<br>>12 months<br>components: ≥5<br>main: ORG HC                                                                                    | Usual care                                               | Process: 8<br>HC use: 2                                                                                   |
| Allen-Ramey 2002 | CBA                 | USA<br>Managed care organisation                              | N=3013<br>women: 70.9%<br>mean age: 46.6<br>asthma: mod/sev | Anthem "Healthy Solutions for Asthma" program<br>3-36 months<br>components: 9<br>main: EDU                                                                                      | Limited intervention for patients and HC professionals   | Process: 2<br>HC use: 2<br>Symptoms/activity: 2<br>Self-care: 1                                           |

| Study ID       | Design (allocation) | Country HC setting                          | Patients                                                         | Intervention (name <sup>1</sup> , duration, number of components, main component)                                                      | Comparison                     | Outcomes                                                                                 |
|----------------|---------------------|---------------------------------------------|------------------------------------------------------------------|----------------------------------------------------------------------------------------------------------------------------------------|--------------------------------|------------------------------------------------------------------------------------------|
| Curtin 1998    | CBA                 | USA<br>Health care plan PCPs                | N=na<br>women: % na<br>mean age: na<br>asthma: na                | Asthma Game Plan and reminder system<br>6 months<br>components: 6<br>main: ORG HC                                                      | Usual care                     | Process: 2<br>HC use: 3                                                                  |
| Gaude 2014     | CBA                 | India<br>Tertiary care hospital             | N=500<br>women: % na<br>mean age: 37<br>asthma: na               | Health education and self-action plan to improve the compliance in bronchial asthma patients<br>3 months<br>components: 6<br>main: EDU | Usual care                     | Self-care: 1                                                                             |
| Kelso 1996     | CBA                 | USA<br>Teaching hospital and the community  | N=39<br>women: 79.5%<br>mean age: 38.2<br>asthma: mod/sev        | Comprehensive long-term management program for asthma in adult African-Americans<br>Ongoing<br>components: 6<br>main: EDU              | Usual care                     | Process: 2<br>HC use: 2                                                                  |
| Saini 2004     | CBA                 | Australia<br>Pharmacies                     | N=67<br>women: 68.5%<br>mean age: 42.6<br>asthma: mod/sev        | The Australia Six-Step Asthma Management Plan<br>6 months<br>components: 7<br>main: EDU                                                | Usual care                     | Process: 1<br>HC use: 1<br>Pt satis: 1<br>QOL: 1<br>Symptoms/activity: 4<br>Self-care: 4 |
| Saini 2008     | CBA                 | Australia<br>Pharmacies                     | N=83<br>women: 69%<br>mean age: 50.6<br>asthma: mod/sev          | Rural Asthma Management Service (RAMS)<br>6 months<br>components: 8<br>main: EDU                                                       | Usual care                     | Process: 2<br>HC use: 1<br>QOL: 1<br>Symptoms/activity: 2<br>Self-care: 4                |
| Tatis 2005     | CBA                 | USA<br>University-affiliated medical centre | N=396<br>women: 71%<br>mean age: 38.4<br>asthma: na              | Culturally-targeted program aimed at reducing asthma morbidity<br>18 months<br>components: 8<br>main: EDU                              | Usual care                     | HC use: 2<br>QOL: 1<br>Self-care: 1                                                      |
| Brandao 2009   | BA                  | Brazil<br>Outpatient clinics                | N=102<br>women: 80.4%<br>mean age: 43<br>asthma: mod/sev         | Program for the Control of Asthma and Allergic Rhinitis in Feira de Santana (ProAR-FS)<br>12 months<br>components: 4<br>main: EDU      | Usual care before intervention | HC use: 2                                                                                |
| Charlton 1991  | BA                  | UK<br>PCPs                                  | N=115<br>women: 62.3%<br>mean age: 56.2<br>asthma: mod/sev       | Nurse-run asthma clinic<br>Ongoing<br>components: 8<br>main: EDU                                                                       | Usual care before intervention | Process: 1<br>HC use: 1<br>Symptoms/activity: 3                                          |
| Charlton 1992  | BA                  | UK<br>PCPs                                  | N=105<br>women: 57%<br>mean age: 42<br>asthma: na                | Nurse-run asthma clinic<br>Ongoing<br>components: 4<br>main: EDU                                                                       | Usual care before intervention | HC use: 3<br>QOL: 1<br>Pt satis: 1<br>Symptoms/activity: 3<br>Self-care: 1               |
| Dsouza 1994    | BA                  | New Zealand<br>Community centres            | N=46 (at 12 mo)<br>women: 80%<br>mean age: 38<br>asthma: na      | Wairarapa Asthma Program<br>4 months<br>components: 6<br>main: EDU                                                                     | Usual care before intervention | Process: 3<br>HC use: 3<br>Symptoms/activity: 3<br>Lung function: 1                      |
| Dsouza 1996    | BA                  | New Zealand<br>Hospital outpatient clinic   | N=26 (at 12 mo)<br>women: 70%<br>mean age: na<br>asthma: mod/sev | Asthma Program<br>6 months<br>components: 6<br>main: EDU                                                                               | Usual care before intervention | HC use: 1<br>Symptoms/activity: 4                                                        |
| Emmertson 2003 | BA                  | New Zealand<br>Pharmacies                   | N=100<br>women: % na<br>mean age: na<br>asthma: na               | Pharmaceutical care demonstration project<br>24 months<br>components: 6<br>main: EDU                                                   | Usual care before intervention | Process: 2<br>QOL: 2<br>Symptoms/activity: 3<br>Lung function: 1                         |

| Study ID            | Design (allocation) | Country HC setting                  | Patients                                                            | Intervention (name <sup>1</sup> , duration, number of components, main component)                           | Comparison                     | Outcomes                                                                            |
|---------------------|---------------------|-------------------------------------|---------------------------------------------------------------------|-------------------------------------------------------------------------------------------------------------|--------------------------------|-------------------------------------------------------------------------------------|
| Franco 2007         | BA                  | Brazil<br>Referral clinic           | N=64<br>women: 84%<br>mean age: 45<br>asthma: mod/sev               | Program for the Control of Asthma and Allergic Rhinitis (ProAR)<br>Ongoing<br>components: 6<br>main: ORG_HC | Usual care before intervention | HC use: 5<br>QOL: 1<br>Symptoms/activity: 1<br>Lung function: 2                     |
| Franco 2009         | BA                  | Brazil<br>Referral clinic           | N=180<br>women: 84%<br>mean age: 45<br>asthma: mod/sev              | Program for the Control of Asthma and Allergic Rhinitis (ProAR)<br>Ongoing<br>components: 6<br>main: ORG_HC | Usual care before intervention | Process: 1<br>HC use: 4<br>QOL: 1<br>Symptoms/activity: 1<br>Lung function: 2       |
| Hertzman 2005       | BA                  | Russia<br>Hospitals and policlinics | N=85<br>women: 67%<br>mean age: 50.2<br>asthma: mod/sev             | Ongoing<br>components: 7<br>main: EDU / ORG_HC                                                              | Usual care before intervention | HC use: 2<br>Pt satis: 1<br>Symptoms/activity: 4<br>Lung function: 1                |
| Ignacio-Garcia 2002 | BA                  | Spain<br>General hospital           | N=63<br>women: 44%<br>mean age: 39.5<br>asthma: mod/sev             | Asthma self-management education program<br>36 months<br>components: 7<br>main: EDU                         | Usual care before intervention | Process: 1<br>HC use: 3<br>Symptoms/activity: 5<br>Lung function: 1                 |
| Licksai 2012        | BA                  | Canada<br>PCPs                      | N=312<br>women: 60.7%<br>mean age: 35.7<br>asthma: mild/mod         | The Essex County Community Asthma Care Strategy<br>Ongoing<br>components: 7<br>main: ORG_HC                 | Usual care before intervention | Process: 4<br>HC use: 2<br>Symptoms/activity: 2                                     |
| Lind 2006           | BA                  | USA<br>Managed care organisation    | N=1982<br>women: 66%<br>mean age: 35<br>asthma: mild/mod            | The Washington State Asthma Program<br>Ongoing<br>components: 10<br>main: EDU                               | Usual care before intervention | Process: 8<br>HC use: 3<br>Pt satis: 1                                              |
| Lindberg 1999       | BA                  | Sweden<br>A PCP                     | N=63<br>women: 63.5%<br>mean age: na<br>asthma: mild/mod            | Asthma Nurse Practice<br>12 months<br>components: 6<br>main: ORG_HC                                         | Usual care before intervention | Process: 6<br>HC use: 1<br>Symptoms/activity: 2<br>Self-care: 1<br>Lung function: 3 |
| Maljanian 1999      | BA                  | USA<br>Hospital                     | N=68 (at 12 mo)<br>women: % na<br>mean age: na<br>asthma: mod/sev   | Asthma Control and Education program (ACE)<br>12 months<br>components: 7<br>main: EDU                       | Usual care before intervention | HC use: 2<br>QOL: 2<br>Symptoms/activity: 1<br>Self-care: 1                         |
| Mangiapane 2005     | BA                  | Germany<br>Pharmacies               | N=128<br>women: 65.6%<br>mean age: 43.1<br>asthma: mild/mod         | Community pharmacy-based pharmaceutical care<br>12 months<br>components: 5<br>main: EDU                     | Usual care before intervention | Process: 4<br>QOL: 1<br>Symptoms/activity: 3<br>Self-care: 4<br>Lung function: 4    |
| Nähri 2001          | BA                  | Finland<br>Pharmacies               | N=26 (at 12 mo)<br>women: 75%<br>mean age: 41.3<br>asthma: mild/mod | Therapeutic Outcomes Monitoring (TOM) program<br>12 months<br>components: 5<br>main: EDU                    | Usual care before intervention | Pt satis: 2<br>QOL: 2<br>Self-care: 3                                               |
| Patel 2004          | BA                  | USA<br>Large medical group practice | N=2920 (at 12 mo)<br>women: % na<br>mean age: na<br>asthma: na      | Advocate Health Centers (AHC) Asthma Project<br>12 months<br>components: 12<br>main: ORG_PT / ORG_HC        | Usual care before intervention | Process: 4<br>HC use: 3<br>Self-care: 2                                             |
| Pauley 1995         | BA                  | USA<br>Hospital                     | N=25<br>women: 68%<br>mean age: 32<br>asthma: na                    | Asthma clinic<br>6 months<br>components: 5<br>main: EDU                                                     | Usual care before intervention | Process: 3<br>HC use: 2                                                             |
| Ponte 2007          | BA                  | Brazil<br>Referral clinic           | N=269<br>women: 75.8%<br>mean age: 46<br>asthma: mod/sev            | Program for the Control of Asthma and Allergic Rhinitis (ProAR)<br>Ongoing<br>components: 5<br>main: ORG_HC | Usual care before intervention | HC use: 2<br>Symptoms/activity: 2                                                   |

| Study ID           | Design (allocation)    | Country HC setting                               | Patients                                                                        | Intervention (name <sup>1</sup> , duration, number of components, main component)                             | Comparison                        | Outcomes                                                                  |
|--------------------|------------------------|--------------------------------------------------|---------------------------------------------------------------------------------|---------------------------------------------------------------------------------------------------------------|-----------------------------------|---------------------------------------------------------------------------|
| Steuten 2006       | BA                     | Netherlands<br>PCPs and a hospital               | N=nc<br>women: 75.9%<br>mean age: 38.8<br>asthma: mild/mod                      | Regional disease management program<br>12 months<br>components: 7<br>main: ORG_HC                             | Usual care before intervention    | HC use: 1<br>Pt satis: 1<br>QoL: 2<br>Lung function: 3                    |
| To 2008            | BA                     | Canada<br>PCPs                                   | N=551<br>women: 59%<br>mean age: 54<br>asthma: mild/mod                         | Primary care asthma pilot project (PCAPP)<br>12 months<br>components: 9<br>main: EDU                          | Usual care before intervention    | Process: 4<br>HC use: 2<br>Symptoms/activity: 4                           |
| Tschopp 2002       | BA                     | Switzerland<br>PCPs within a health network      | N=66<br>women: 43.4%<br>mean age: 43<br>asthma: mod/sev                         | Mieux vivre avec son asthme<br>12 months<br>components: 9<br>main: EDU                                        | Usual care before intervention    | HC use: 3<br>QoL: 1<br>Symptoms/activity: 2<br>Lung function: 2           |
| Boonsawat 2013     | ITS (population based) | Thailand<br>Hospitals                            | N=44,124 (at baseline)<br>women: % na<br>mean age: na<br>asthma: na             | National Asthma Program<br>Duration: nc<br>components: 7<br>main: ORG_HC                                      | Usual care before intervention    | Process: 2<br>HC use: 2                                                   |
| Fireman 2004       | ITS (population based) | USA<br>Kaiser Permanente Medical group practices | 32,246 (patient years at baseline)<br>women: % na<br>mean age: 42<br>asthma: na | The Permanente Medical Group (TPMG) disease management program<br>12 months<br>components: 11<br>main: ORG_HC | Usual care before intervention    | Process: 1<br>HC use: 5<br>Symptoms/activity: 2                           |
| Haahela 2006       | ITS (population based) | Finland<br>Hospitals, clinics and pharmacies     | N=na<br>women: % na<br>mean age: na<br>asthma: na                               | Finnish National Asthma Program 1994-2004<br>Ongoing<br>components: 12<br>main: ORG_HC                        | Usual care before intervention    | Org: 1<br>Process: 1<br>HC use: 5<br>Pt satis: 1<br>Symptoms/activity: 1  |
| Kauppi 2013        | ITS (population based) | Finland<br>Hospitals, clinics and pharmacies     | N=na<br>women: % na<br>mean age: na<br>asthma: na                               | Finnish Allergy Program 2008-2018<br>Ongoing<br>components: ≥12<br>main: ORG_HC                               | Usual care before intervention    | HC use: 1                                                                 |
| Mehring 2013       | ITS (population based) | Germany<br>PCPs                                  | N=20,982 (at baseline)<br>women: % na<br>mean age: na<br>asthma: na             | German disease management programs for asthma<br>Ongoing<br>components: 10<br>main: EDU / ORG_HC              | Usual care before intervention    | Process: 8<br>HC use: 1<br>Symptoms/activity: 1                           |
| Souza-Machado 2010 | ITS (population based) | Brazil<br>Specialized clinics                    | N=na<br>women: % na<br>mean age: na<br>asthma: na                               | Program for the Control of Asthma and Allergic Rhinitis (ProAR)<br>Ongoing<br>components: 8<br>main: ORG_HC   | Usual care before intervention    | Process: 1<br>HC use: 1<br>Symptoms/activity: 1                           |
| Carmo 2011         | XS                     | Brazil<br>Family health units                    | N=313<br>women: 57.2%<br>mean age: na<br>asthma: mild/mod                       | Respira Londrina<br>>4 months<br>components: 7<br>main: EDU                                                   | Limited intervention for patients | Org: 1<br>Process: 3<br>HC use: 3<br>Symptoms/activity: 1                 |
| Lindberg 2002      | XS                     | Sweden<br>PCPs                                   | N=348<br>women: 53.9%<br>mean age: 48.5<br>asthma: na                           | Asthma Nurse Practice<br>Duration: nc<br>components: 7<br>main: ORG_HC                                        | Usual care                        | Process: 5<br>HC use: 1<br>QoL: 1<br>Symptoms/activity: 4<br>Self-care: 4 |

<sup>1</sup> name of intervention or brief description if name not provided RCT: randomised controlled trial; QRCT: quasi randomised controlled trial; CBA\*: controlled before-after study (with 2 or more sites for intervention and control groups); CBA: controlled before-after study; ITS: interrupted-time-series study; BA: before-after study (without external control group); XS: cross-sectional studies (with concurrent measurement of intervention exposure and outcomes); PCP: primary care practice; EDU: education component; ORG\_HC: organisational component targeting the healthcare system or professionals; ORG\_PT: organisational component targeting patients; QoL: quality of life; HC: healthcare; na: not available; nc: not clear
